# Supplementary material
Source: publisher figshare collection journal article supplement (https://asha.figshare.com/articles/dataset/_/28570475)
Supplement: Supplementary file 1 [file 1]

**Supplemental Material S4.** Graded response model (GRM) item parameters.

| Grammatical Form             | Item | Whole Sample   |       |       | DLD            |       |       | TD             |        |       |
|------------------------------|------|----------------|-------|-------|----------------|-------|-------|----------------|--------|-------|
|                              |      | Discrimination | T1    | T2    | Discrimination | T1    | T2    | Discrimination | T1     | T2    |
| Simple Intransitive Sentence | 1    | 1.83           | -2.61 | -0.06 | 1.65           | -2.60 | -0.27 | 1.65           | -2.60  | -0.27 |
|                              | 2    | 1.37           | -3.12 | -0.53 | 1.82           | -1.50 | -0.15 | 0.84           | -13.82 | -1.11 |
|                              | 3    | 1.87           | -1.96 | 0.00  | 2.77           | -1.21 | 0.31  | 1.56           | -2.70  | -0.17 |
|                              | 4    | 1.87           | -2.34 | -0.49 | 1.88           | -1.89 | -0.25 | 1.68           | -2.91  | -0.75 |
| Ditransitive Verb            | 5    | 1.40           | -3.38 | -1.14 | 1.83           | -2.08 | -0.68 | 0.95           | -12.27 | -2.09 |
|                              | 6    | 1.36           | -2.17 | -0.18 | 1.23           | -1.46 | 0.97  | 1.10           | -3.26  | -0.67 |
|                              | 7    | 2.09           | -2.23 | -0.52 | 4.39           | -1.56 | -0.04 | 1.39           | -3.55  | -0.93 |
|                              | 8    | 1.95           | -2.65 | -0.51 | 8.36           | -1.75 | -0.23 | 1.40           | -4.02  | -0.95 |
| Aspect                       | 9    | 2.47           | -1.73 | -0.02 | 2.63           | -0.89 | 0.57  | 1.99           | -2.47  | -0.41 |
|                              | 10   | 1.67           | -2.15 | -0.34 | 1.62           | -1.38 | 0.12  | 1.82           | -2.20  | -0.65 |
|                              | 11   | 1.66           | -2.72 | -0.61 | 3.56           | -1.92 | -0.13 | 1.35           | -3.54  | -1.25 |
|                              | 12   | 1.61           | -3.36 | -1.01 | 2.14           | -2.29 | -0.17 | 0.98           | -5.27  | -2.04 |
| Passive                      | 13   | 1.94           | -1.66 | -0.15 | 3.01           | -1.06 | -0.39 | 1.80           | -2.21  | -0.23 |
|                              | 14   | 2.23           | -1.97 | -0.05 | 1.88           | -1.31 | 1.06  | 1.82           | -3.05  | -0.45 |
|                              | 15   | 1.99           | -1.34 | 0.24  | 2.52           | -0.76 | 0.90  | 1.64           | -1.71  | -0.06 |
|                              | 16   | 1.77           | -3.05 | -0.54 | 4.11           | -1.91 | -0.13 | 0.91           | -12.84 | -1.41 |
| Classifier                   | 17   | 2.58           | -2.71 | -0.72 | 10.10          | -1.89 | -0.32 | 1.89           | -6.91  | -1.16 |
|                              | 18   | 1.88           | -2.49 | 0.21  | 3.17           | -1.56 | 1.02  | 1.41           | -3.49  | -0.04 |
|                              | 19   | 2.21           | -1.77 | -0.22 | 4.98           | -0.93 | -0.03 | 1.45           | -3.41  | -0.49 |
|                              | 20   | 1.86           | -1.39 | 0.38  | 2.97           | -0.88 | 0.84  | 1.33           | -2.12  | 0.11  |
| Adverbial Clause             | 21   | 1.93           | -2.12 | -0.29 | 2.47           | -1.11 | 0.09  | 1.80           | -3.06  | -0.56 |
|                              | 22   | 1.58           | -2.59 | -0.08 | 1.50           | -1.56 | 0.65  | 1.33           | -3.60  | -0.47 |
|                              | 23   | 1.71           | -2.10 | 0.11  | 1.20           | -1.68 | 0.59  | 1.83           | -2.54  | -0.08 |
|                              | 24   | 2.09           | -1.95 | 0.60  | 2.15           | -1.44 | 0.81  | 1.57           | -2.76  | 0.52  |
| Object Complement Clause     | 25   | 2.26           | -1.18 | 0.13  | 1.73           | -0.68 | 0.58  | 2.22           | -1.76  | -0.10 |
|                              | 26   | 1.75           | -2.13 | -0.32 | 2.08           | -1.49 | 0.05  | 1.36           | -3.03  | -0.70 |
|                              | 27   | 2.36           | -1.99 | -0.12 | 7.71           | -1.59 | 0.14  | 1.77           | -2.43  | -0.44 |
|                              | 28   | 2.07           | -0.87 | 0.49  | 2.33           | -0.77 | 0.94  | 2.15           | -0.92  | 0.34  |
| Relative Clause: Object      | 29   | 2.01           | -1.63 | 0.43  | 2.19           | -1.10 | 0.97  | 1.46           | -2.54  | 0.16  |
|                              | 30   | 1.11           | -2.48 | -0.29 | 2.00           | -1.12 | -0.15 | 0.52           | -7.20  | -1.09 |
|                              | 31   | 1.46           | -2.47 | -0.35 | 1.93           | -1.82 | -0.40 | 1.14           | -3.58  | -0.69 |
|                              | 32   | 1.84           | -1.91 | -0.13 | 2.13           | -1.43 | 0.10  | 1.68           | -2.16  | -0.33 |
| Relative Clause: Subject     | 33   | 2.14           | -0.67 | 1.71  | 3.89           | -0.04 | 1.15  | 1.71           | -1.19  | 1.74  |
|                              | 34   | 2.35           | -1.40 | 0.29  | 3.43           | -1.00 | 0.81  | 1.82           | -1.83  | 0.06  |
|                              | 35   | 1.76           | -0.82 | 1.01  | 2.62           | -0.25 | 1.37  | 1.43           | -1.32  | 0.83  |
|                              | 36   | 2.11           | -2.01 | -0.34 | 2.01           | -1.14 | 0.31  | 1.99           | -2.68  | -0.74 |

|          |    |      |       |       |      |       |       |      |       |       |
|----------|----|------|-------|-------|------|-------|-------|------|-------|-------|
| Negation | 37 | 1.62 | -1.99 | 0.23  | 2.18 | -1.12 | -0.04 | 1.45 | -3.11 | 0.21  |
|          | 38 | 1.67 | -2.54 | -0.50 | 2.74 | -1.97 | -0.36 | 1.40 | -2.94 | -0.76 |
|          | 39 | 1.92 | -0.43 | 0.90  | 2.05 | -0.16 | 1.13  | 1.74 | -0.75 | 0.82  |
|          | 40 | 1.90 | -2.47 | -0.08 | 1.77 | -1.53 | 0.09  | 2.26 | -6.09 | -0.29 |

*Note.* T1 and T2 indicate Thresholds 1 and 2, respectively. These are the thresholds of difficulty for scoring 1 instead of 0 (T1), and for scoring 2 instead of 1 (T2).
