# Supplementary material
Source: publisher figshare collection journal article supplement (https://asha.figshare.com/articles/dataset/_/28570475)
Supplement: Supplementary file 2 [file 1]

**Supplemental Material S3. GRM item fit.**

| Item | $\chi^2$ | df | <i>p</i>    | RMSEA        |
|------|----------|----|-------------|--------------|
| 01   | 22.07    | 25 | .632        | 0.000        |
| 03   | 21.72    | 25 | .652        | 0.000        |
| 04   | 20.44    | 20 | .431        | 0.011        |
| 07   | 18.42    | 18 | .428        | 0.011        |
| 08   | 15.65    | 19 | .681        | 0.000        |
| 09   | 23.12    | 21 | .338        | 0.023        |
| 10   | 29.02    | 22 | .144        | 0.040        |
| 11   | 22.50    | 19 | .260        | 0.031        |
| 13   | 33.92    | 23 | .066        | 0.049        |
| 14   | 15.53    | 21 | .795        | 0.000        |
| 15   | 38.17    | 23 | <i>.024</i> | <i>0.058</i> |
| 17   | 15.25    | 15 | .434        | 0.009        |
| 18   | 19.54    | 21 | .551        | 0.000        |
| 19   | 29.71    | 21 | .098        | 0.046        |
| 20   | 37.45    | 24 | <i>.039</i> | <i>0.054</i> |
| 21   | 33.71    | 21 | <i>.039</i> | <i>0.056</i> |
| 22   | 21.52    | 24 | .608        | 0.000        |
| 24   | 21.52    | 19 | .309        | 0.026        |
| 25   | 31.66    | 24 | .136        | 0.040        |
| 26   | 17.41    | 22 | .740        | 0.000        |
| 27   | 16.51    | 20 | .684        | 0.000        |
| 28   | 36.93    | 23 | <i>.033</i> | <i>0.056</i> |
| 29   | 20.95    | 23 | .584        | 0.000        |
| 32   | 18.47    | 24 | .779        | 0.000        |
| 33   | 24.65    | 19 | .172        | 0.039        |
| 34   | 28.05    | 23 | .214        | 0.034        |
| 35   | 17.31    | 23 | .794        | 0.000        |
| 36   | 29.30    | 21 | .107        | 0.045        |
| 37   | 28.28    | 24 | .248        | 0.030        |
| 38   | 11.00    | 22 | .975        | 0.000        |
| 39   | 25.61    | 23 | .320        | 0.024        |
| 40   | 30.68    | 23 | .131        | 0.041        |

*Note.* Italicized values in red text indicate poor fit.
