# Supplementary material
Source: publisher figshare collection journal article supplement (https://asha.figshare.com/articles/dataset/_/28570475)
Supplement: Supplementary file 3 [file 1]

**Supplemental Material S2.** Whole-sample Rasch and 2PL item parameters for 24 unidimensional items.

| Grammatical Form             | Item | Rasch          |             | 2PL            |            |
|------------------------------|------|----------------|-------------|----------------|------------|
|                              |      | Discrimination | Difficulty  | Discrimination | Difficulty |
| Simple Intransitive Sentence | 3    | 1.00           | -0.06       | 1.84           | -0.03      |
|                              | 4    | 1.00           | -1.00       | 2.04           | -0.50      |
| Ditransitive Verb            | 7    | 1.00           | -1.15       | 1.72           | -0.63      |
| Aspect                       | 9    | 1.00           | -0.13       | 2.54           | -0.04      |
| Passive                      | 13   | 1.00           | -0.40       | 1.63           | -0.23      |
|                              | 14   | 1.00           | -0.19       | 2.52           | -0.07      |
|                              | 15   | 1.00           | 0.44        | 1.73           | 0.23       |
| Classifier                   | 17   | 1.00           | -1.73       | 2.45           | -0.82      |
|                              | 19   | 1.00           | -0.57       | 1.81           | -0.30      |
| Adverbial Clause             | 21   | 1.00           | -0.67       | 1.83           | -0.36      |
|                              | 23   | 1.00           | 0.14        | 1.35           | 0.07       |
|                              | 24   | 1.00           | 1.18        | 2.07           | 0.60       |
| Object Complement Clause     | 25   | 1.00           | 0.21        | 2.28           | 0.11       |
|                              | 26   | 1.00           | -0.64       | 1.89           | -0.33      |
|                              | 27   | 1.00           | -0.36       | 2.33           | -0.16      |
|                              | 28   | 1.00           | 0.97        | 2.22           | 0.48       |
| Relative Clause: Object      | 29   | 1.00           | 0.84        | 2.10           | 0.42       |
|                              | 32   | 1.00           | -0.33       | 1.99           | -0.16      |
| Relative Clause: Subject     | 33   | 1.00           | <i>3.58</i> | 2.56           | 1.64       |
|                              | 34   | 1.00           | 0.54        | 1.92           | 0.28       |
|                              | 36   | 1.00           | -0.75       | 2.06           | -0.37      |
| Negation                     | 38   | 1.00           | -0.97       | 1.59           | -0.55      |
|                              | 39   | 1.00           | 1.78        | 1.68           | 0.97       |
|                              | 40   | 1.00           | -0.23       | 1.80           | -0.12      |

*Note.* All items are assumed to be equally discriminating in the Rasch model, thus Discrimination is fixed at 1.00 for all items in this model. Red italic text notes items with problematic parameters (i.e., discrimination < 1.0; difficulty outside of the informative range of -3.0 to +3.0).
