# Supplementary material
Source: publisher figshare collection journal article supplement (https://asha.figshare.com/articles/dataset/_/28570475)
Supplement: Supplementary file 4 [file 1]

**Supplemental Material S1.** Rasch and 2PL item fit statistic.

| Grammatical Form             | Item | Rasch – Whole Sample |    |                    |                       | 2PL – Whole Sample |    |                    |      | 2PL – DLD |    |                    |                    | 2PL – TD |    |                    |                    |
|------------------------------|------|----------------------|----|--------------------|-----------------------|--------------------|----|--------------------|------|-----------|----|--------------------|--------------------|----------|----|--------------------|--------------------|
|                              |      | $\chi^2$             | df | RMSEA              | p                     | $\chi^2$           | df | RMSEA              | p    | $\chi^2$  | df | RMSEA              | p                  | $\chi^2$ | df | RMSEA              | p                  |
| Simple Intransitive Sentence | 1    | 24.59                | 20 | 0.03               | .22                   | 25.96              | 22 | 0.03               | 0.25 | 3.93      | 1  | <b><u>0.33</u></b> | <b><u>0.05</u></b> | 17.71    | 15 | 0.04               | 0.28               |
|                              | 2    | 35.49                | 19 | <b><u>0.07</u></b> | <b><u>.01</u></b>     | 34.59              | 23 | <b><u>0.05</u></b> | 0.06 | 1.38      | 2  | 0.00               | 0.50               | 13.78    | 16 | 0.00               | 0.62               |
|                              | 3    | 24.00                | 20 | 0.03               | .24                   | 25.12              | 20 | 0.04               | 0.20 | 0.56      | 1  | 0.00               | 0.45               | 16.42    | 15 | 0.03               | 0.35               |
|                              | 4    | 11.36                | 20 | 0.00               | .94                   | 9.76               | 17 | 0.00               | 0.91 | 0.17      | 1  | 0.00               | 0.68               | 7.33     | 11 | 0.00               | 0.77               |
| Ditransitive Verb            | 5    | 12.76                | 15 | 0.00               | .62                   | 16.16              | 17 | 0.00               | 0.51 | NA        | 0  | NA                 | NA                 | 4.44     | 9  | 0.00               | 0.88               |
|                              | 6    | 22.83                | 21 | 0.02               | .35                   | 19.66              | 22 | 0.00               | 0.60 | 2.56      | 2  | <b><u>0.10</u></b> | 0.28               | 15.75    | 15 | 0.02               | 0.40               |
|                              | 7    | 22.36                | 19 | 0.03               | .27                   | 22.08              | 18 | 0.03               | 0.23 | 1.00      | 1  | 0.00               | 0.32               | 11.16    | 12 | 0.00               | 0.51               |
|                              | 8    | 16.12                | 20 | 0.00               | .71                   | 15.83              | 20 | 0.00               | 0.73 | NA        | NA | NA                 | NA                 | 12.20    | 13 | 0.00               | 0.51               |
| Aspect                       | 9    | 27.37                | 19 | 0.05               | .10                   | 26.25              | 16 | <b><u>0.06</u></b> | 0.05 | 0.78      | 1  | 0.00               | 0.38               | 10.63    | 11 | 0.00               | 0.48               |
|                              | 10   | 21.73                | 20 | 0.02               | .36                   | 20.74              | 23 | 0.00               | 0.60 | 0.34      | 2  | 0.00               | 0.84               | 10.75    | 13 | 0.00               | 0.63               |
|                              | 11   | 20.13                | 19 | 0.02               | .39                   | 18.73              | 19 | 0.00               | 0.47 | 0.02      | 1  | 0.00               | 0.89               | 15.45    | 12 | 0.05               | 0.22               |
|                              | 12   | 20.06                | 14 | 0.05               | .13                   | 20.33              | 14 | 0.05               | 0.12 | NA        | 0  | NA                 | NA                 | 16.78    | 9  | <b><u>0.08</u></b> | 0.05               |
| Passive                      | 13   | 19.17                | 20 | 0.00               | .51                   | 19.27              | 21 | 0.00               | 0.57 | NA        | 0  | NA                 | NA                 | 16.80    | 13 | 0.05               | 0.21               |
|                              | 14   | 22.49                | 20 | 0.03               | .31                   | 17.44              | 16 | 0.02               | 0.36 | NA        | 0  | NA                 | NA                 | 12.28    | 11 | 0.03               | 0.34               |
|                              | 15   | 19.63                | 20 | 0.00               | .48                   | 19.36              | 19 | 0.01               | 0.43 | NA        | 0  | NA                 | NA                 | 14.77    | 15 | 0.00               | 0.47               |
|                              | 16   | 20.83                | 20 | 0.01               | .41                   | 20.23              | 21 | 0.00               | 0.51 | NA        | 0  | NA                 | NA                 | 13.14    | 14 | 0.00               | 0.52               |
| Classifier                   | 17   | 20.10                | 17 | 0.03               | .27                   | 15.80              | 13 | 0.03               | 0.26 | NA        | NA | NA                 | NA                 | 7.43     | 7  | 0.02               | 0.39               |
|                              | 18   | 18.21                | 20 | 0.00               | .57                   | 17.69              | 21 | 0.00               | 0.67 | NA        | 0  | NA                 | NA                 | 13.17    | 18 | 0.00               | 0.78               |
|                              | 19   | 18.64                | 20 | 0.00               | .55                   | 17.40              | 19 | 0.00               | 0.56 | NA        | 0  | NA                 | NA                 | 21.38    | 14 | <b><u>0.07</u></b> | 0.09               |
|                              | 20   | 16.38                | 20 | 0.00               | .69                   | 16.36              | 19 | 0.00               | 0.63 | NA        | NA | NA                 | NA                 | 14.35    | 18 | 0.00               | 0.71               |
| Adverbial Clause             | 21   | 13.04                | 20 | 0.00               | .88                   | 13.47              | 20 | 0.00               | 0.86 | NA        | NA | NA                 | NA                 | 15.64    | 12 | <b><u>0.05</u></b> | 0.21               |
|                              | 22   | 30.45                | 20 | <b><u>0.05</u></b> | .06                   | 27.37              | 22 | 0.04               | 0.20 | 5.05      | 2  | <b><u>0.24</u></b> | 0.08               | 31.13    | 16 | <b><u>0.09</u></b> | <b><u>0.01</u></b> |
|                              | 23   | 12.87                | 20 | 0.00               | .88                   | 11.10              | 22 | 0.00               | 0.97 | 2.36      | 3  | 0.00               | 0.50               | 11.11    | 16 | 0.00               | 0.80               |
|                              | 24   | 14.88                | 18 | 0.00               | .67                   | 9.23               | 16 | 0.00               | 0.90 | NA        | 0  | NA                 | NA                 | 10.70    | 15 | 0.00               | 0.77               |
| Object Complement Clause     | 25   | 21.84                | 20 | 0.02               | .35                   | 16.81              | 16 | 0.02               | 0.40 | 0.39      | 2  | 0.00               | 0.82               | 6.84     | 12 | 0.00               | 0.87               |
|                              | 26   | 14.17                | 20 | 0.00               | .82                   | 14.33              | 20 | 0.00               | 0.81 | NA        | 0  | NA                 | NA                 | 12.73    | 14 | 0.00               | 0.55               |
|                              | 27   | 13.37                | 20 | 0.00               | .86                   | 8.95               | 16 | 0.00               | 0.92 | NA        | 0  | NA                 | NA                 | 10.89    | 14 | 0.00               | 0.69               |
|                              | 28   | 14.89                | 19 | 0.00               | .73                   | 11.40              | 16 | 0.00               | 0.78 | 0.72      | 1  | 0.00               | 0.40               | 9.38     | 13 | 0.00               | 0.74               |
| Relative Clause: Object      | 29   | 26.39                | 19 | 0.04               | .12                   | 26.12              | 17 | <b><u>0.05</u></b> | 0.07 | NA        | 0  | NA                 | NA                 | 19.09    | 16 | 0.04               | 0.26               |
|                              | 30   | 47.13                | 20 | <b><u>0.08</u></b> | <b><u>&lt;.01</u></b> | 25.17              | 27 | 0.00               | 0.56 | 1.92      | 2  | 0.00               | 0.38               | 16.89    | 21 | 0.00               | 0.72               |
|                              | 31   | 18.16                | 20 | 0.00               | .58                   | 14.54              | 23 | 0.00               | 0.91 | 0.44      | 1  | 0.00               | 0.51               | 24.49    | 18 | <b><u>0.05</u></b> | 0.14               |
|                              | 32   | 21.82                | 21 | 0.01               | .41                   | 22.70              | 21 | 0.02               | 0.36 | 0.37      | 1  | 0.00               | 0.55               | 17.50    | 14 | 0.05               | 0.23               |
| Relative Clause: Subject     | 33   | 9.66                 | 7  | 0.04               | .21                   | 6.55               | 5  | 0.04               | 0.26 | NA        | NA | NA                 | NA                 | 4.27     | 5  | 0.00               | 0.51               |
|                              | 34   | 12.86                | 20 | 0.00               | .88                   | 12.38              | 19 | 0.00               | 0.87 | 0.14      | 1  | 0.00               | 0.71               | 12.15    | 15 | 0.00               | 0.67               |
|                              | 35   | 11.63                | 16 | 0.00               | .77                   | 17.24              | 17 | 0.01               | 0.44 | NA        | NA | NA                 | NA                 | 19.63    | 14 | <b><u>0.06</u></b> | 0.14               |
|                              | 36   | 16.81                | 21 | 0.00               | .72                   | 14.04              | 17 | 0.00               | 0.66 | NA        | 0  | NA                 | NA                 | 8.04     | 10 | 0.00               | 0.62               |
| Negation                     | 37   | 21.98                | 20 | 0.02               | .34                   | 17.48              | 22 | 0.00               | 0.74 | 0.87      | 1  | 0.00               | 0.35               | 16.34    | 19 | 0.00               | 0.63               |
|                              | 38   | 16.85                | 20 | 0.00               | .66                   | 16.81              | 20 | 0.00               | 0.66 | 1.32      | 1  | <b><u>0.11</u></b> | 0.25               | 10.07    | 13 | 0.00               | 0.69               |
|                              | 39   | 19.44                | 17 | 0.03               | .30                   | 16.04              | 17 | 0.00               | 0.52 | NA        | 0  | NA                 | NA                 | 8.62     | 12 | 0.00               | 0.73               |
|                              | 40   | 25.49                | 21 | 0.03               | .23                   | 24.18              | 20 | 0.03               | 0.23 | 1.39      | 1  | <b><u>0.12</u></b> | 0.24               | 10.64    | 12 | 0.00               | 0.56               |

Note. Bolded and underlined statistics in red text indicate problematic fit. NA values indicate that there was insufficient data or variance to estimate individual item fit.
